# Supplementary material for: Phytochemical Analysis, α-Glucosidase and Amylase Inhibitory, and Molecular Docking Studies on Persicaria hydropiper L. Leaves Essential Oils
Source: Evid Based Complement Alternat Med. 2022 Jan 19;2022:7924171. doi: 10.1155/2022/7924171 (PMC8791729; doi:10.1155/2022/7924171)
Supplement: Supplementary Materials — Supplementary file S1: data related to identified compounds re provided as File S1 and Table S1 containing the list of identified compounds and their details. [file 7924171.f1.docx]

**Phytochemical analysis, α-glucosidase, amylase inhibitory and molecular docking studies on *Persicaria hydropiper* L. leaves essential oils**

Mater H. Mahnashi1, Yahya S. Alqahtani1, Bandar A. Alyami1, Ali O. Alqarni1, Muhammad Ayaz*2, Mehreen Ghufran3,Farhat Ullah2, Abdul Sadiq2, Ihsan Ullah4, Ikram Ul Haq5, Mohammad Khalid6, HC Ananda Murthy7*

1Department of pharmaceutical chemistry, College of Pharmacy, Najran University, Najran, Kingdom of Saudi Arabia

2Department of Pharmacy, Faculty of Biological Sciences, University of Malakand, Chakdara, 18000 Dir (L), KP, Pakistan.

3Department of Biochemistry, UCS, Shankar, Abdul Wali Khan University, Mardan, Mardan-23200, Pakistan.

4National Institute of Health, Islamabad, Pakistan

5Department of Pharmacy, University of Swabi, Swabi, Pakistan

6Department of Pharmacognosy, College of Pharmacy, Prince Sattam Bin Abdulaziz University, Al-Kharj, 11942, Saudi Arabia

7Department of Applied Chemistry, School of Applied Natural Science,Adama Science and Technology University, P O Box 1888, Adama, Ethiopia.

***Correspondence;***

H C Ananda Murthy: Email: [anandkps350@gmail.com](mailto:anandkps350@gmail.com)

Muhammad Ayaz: Email:[Ayazuop@gmail.com](mailto:Ayazuop@gmail.com)

**File S1: Bioactive compounds identified in GC-MS analysis of Ph.Lo**

**Compound structure:**

**
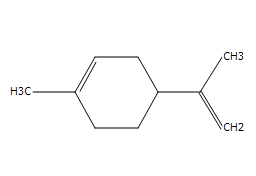
**

| **Compound Label** | **Name** | ***m/z*** | **RT** | **Algorithm** |
| --- | --- | --- | --- | --- |
| Cpd 2: dl-Limonene $$ Cyclohexene, 1-methyl-4-(1-methylethenyl)- (CAS) $$ Nesol | **dl-Limonene $$ Cyclohexene, 1-methyl-4-(1-methylethenyl)- (CAS) $$ Nesol** | 68.1 | 6.351 | Find by Chromatogram Deconvolution |

**Formula:** C10H16

**MS Spectrum:**

**Zoomed MS Spectrum:**

| **MS Spectrum Peak List** | | | | |
| --- | --- | --- | --- | --- |
| ***m/z*** | **Abund** |  |  |  |
| 53.1 | 81068.2 |  |  |  |
| 67.1 | 225131.3 |  |  |  |
| 68.1 | 288986.4 |  |  |  |
| 77.1 | 57796.3 |  |  |  |
| 79.1 | 102685.2 |  |  |  |
| 91.1 | 61285.1 |  |  |  |
| 92.1 | 62680.8 |  |  |  |
| 93.1 | 181474 |  |  |  |
| 94.1 | 70103.9 |  |  |  |
| 107.1 | 51526.6 |  |  |  |

**Library Spectrum:**

**Difference Spectrum:**

**Comparison Library Link:** https://webbook.nist.gov/cgi/cbook.cgi?ID=C138863&Mask=200

-------------------------------------------------------------------------------------------------------------------------------

**Compound Structure:**

**
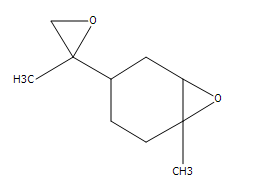
**

| **Compound Label** | **Name** | ***m/z*** | **RT** | **Algorithm** |
| --- | --- | --- | --- | --- |
| Cpd 25: LIMONENE DIOXIDE 2 | **LIMONENE DIOXIDE 2** | 43.1 | 13.77 | Find by Chromatogram Deconvolution |

**MS Spectrum:**

**Zoomed Mass spectrum:**

| **MS Spectrum Peak List** | | | | |
| --- | --- | --- | --- | --- |
| ***m/z*** | **Abund** |  |  |  |
| 41.2 | 29649.2 |  |  |  |
| 43.1 | 164378.9 |  |  |  |
| 53.1 | 20558 |  |  |  |
| 55.1 | 23249.5 |  |  |  |
| 67.1 | 28832.8 |  |  |  |
| 79.1 | 19417.6 |  |  |  |
| 81.1 | 32327.6 |  |  |  |
| 82.1 | 20730.4 |  |  |  |
| 93.1 | 19746.7 |  |  |  |
| 107.1 | 22312.3 |  |  |  |

**Library Spectrum:**

**Difference Spectrum:**

**Comparison Library Link:** https://pubchem.ncbi.nlm.nih.gov/compound/Limonene-dioxide

-------------------------------------------------------------------------------------------------------------------------------

**Compound Structure:**

**
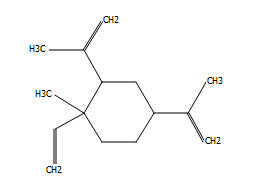
**

| **Compound Label** | **Name** | ***m/z*** | **RT** | **Algorithm** |
| --- | --- | --- | --- | --- |
| Cpd 29: (-)-.beta.-Elemene $$ CIS-1,3-DIISOPROPENYL-TRANS-4-VINYL-4-METHYLCYCLOHEXANE | **(-)-.beta.-Elemene $$ CIS-1,3-DIISOPROPENYL-TRANS-4-VINYL-4-METHYLCYCLOHEXANE** | 93.1 | 14.36 | Find by Chromatogram Deconvolution |

**MS Spectrum:**

**Zoomed Mass spectrum**

| **MS Spectrum Peak List** | | | | |
| --- | --- | --- | --- | --- |
| ***m/z*** | **Abund** |  |  |  |
| 53.1 | 433510.8 |  |  |  |
| 55.1 | 414521.2 |  |  |  |
| 67.1 | 700206.5 |  |  |  |
| 68.1 | 664511 |  |  |  |
| 79.1 | 576768.2 |  |  |  |
| 81.1 | 907553.7 |  |  |  |
| 91.1 | 425317.1 |  |  |  |
| 93.1 | 910153.9 |  |  |  |
| 107.1 | 544808.8 |  |  |  |
| 121.1 | 352549.3 |  |  |  |

**Library Spectrum:**

**Difference Spectrum:**

**Comparison Library Link:** https://pubchem.ncbi.nlm.nih.gov/compound/beta-Elemene

**---------------------------------------------------------------------------------------------------------------------------**

**Compound Structure:**

**
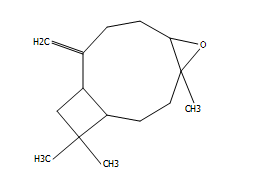
**

| **Compound Label** | **Name** | ***m/z*** | **RT** | **Algorithm** |
| --- | --- | --- | --- | --- |
| Cpd 70: (-)-Caryophyllene oxide $$ (-)-.beta.-Caryophyllene epoxide | **(-)-Caryophyllene oxide $$ (-)-.beta.-Caryophyllene epoxide** | 83.1 | 18.66 | Find by Chromatogram Deconvolution |

**MS Spectrum:**

**Zoomed Mass spectrum**

| **MS Spectrum Peak List** | | | | |
| --- | --- | --- | --- | --- |
| ***m/z*** | **Abund** |  |  |  |
| 41.2 | 225170.6 |  |  |  |
| 43.1 | 226848.2 |  |  |  |
| 55.1 | 295519.7 |  |  |  |
| 69.1 | 217183.7 |  |  |  |
| 79.1 | 224708.7 |  |  |  |
| 83.1 | 425486 |  |  |  |
| 91.1 | 230745.4 |  |  |  |
| 93.1 | 378806 |  |  |  |
| 109.1 | 268305.5 |  |  |  |
| 121.1 | 194041 |  |  |  |

**Library Spectrum:**

**Difference Spectrum:**

**Comparison Library Link:** https://webbook.nist.gov/cgi/cbook.cgi?ID=C1139306&Mask=200

------------------------------------------------------------------------------------------------------------------------

**Compound Structure:**

**
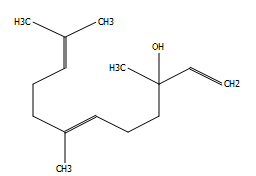
**

| **Compound Label** | **Name** | ***m/z*** | **RT** | **Algorithm** |
| --- | --- | --- | --- | --- |
| Cpd 45: Nerolidol $$ 1,6,10-Dodecatrien-3-ol, 3,7,11-trimethyl- (CAS) $$ E-farnesol | **Nerolidol $$ 1,6,10-Dodecatrien-3-ol, 3,7,11-trimethyl- (CAS) $$ E-farnesol** | 69.1 | 16.27 | Find by Chromatogram Deconvolution |

**MS Spectrum:**

**Zoomed Mass spectrum**

| **MS Spectrum Peak List** | | | | |
| --- | --- | --- | --- | --- |
| ***m/z*** | **Abund** |  |  |  |
| 41.2 | 84589.8 |  |  |  |
| 53.1 | 38743.1 |  |  |  |
| 69.1 | 154865.5 |  |  |  |
| 77.1 | 41199.5 |  |  |  |
| 79.1 | 52518.7 |  |  |  |
| 81.1 | 44691.3 |  |  |  |
| 91.1 | 42455.5 |  |  |  |
| 93.1 | 84032.4 |  |  |  |
| 123.1 | 26712.8 |  |  |  |
| 133.1 | 27806.8 |  |  |  |

**Library Spectrum:**

**Difference Spectrum:**

**Comparison Library Link:** https://webbook.nist.gov/cgi/cbook.cgi?ID=C142507&Mask=200

---------------------------------------------------------------------------------------------------------------------------

**Compound Structure:**

**
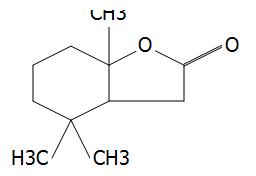
**

| **Compound Label** | **Name** | ***m/z*** | **RT** | **Algorithm** |
| --- | --- | --- | --- | --- |
| Cpd 47: 2(3H)-Benzofuranone, hexahydro-4,4,7a-trimethyl- $$ Tetrahydroactinidiolide | **2(3H)-Benzofuranone, hexahydro-4,4,7a-trimethyl- $$ Tetrahydroactinidiolide** | 43.1 | 16.54 | Find by Chromatogram Deconvolution |

**MS Spectrum:**

**Zoomed Mass spectrum**

| **MS Spectrum Peak List** | | | | |
| --- | --- | --- | --- | --- |
| ***m/z*** | **Abund** |  |  |  |
| 41.2 | 94323.7 |  |  |  |
| 43.1 | 191840.4 |  |  |  |
| 55.1 | 101566.2 |  |  |  |
| 67.1 | 94269.4 |  |  |  |
| 68.1 | 71496.4 |  |  |  |
| 69.1 | 151322.5 |  |  |  |
| 81.1 | 106414.7 |  |  |  |
| 95.1 | 85628.8 |  |  |  |
| 139.1 | 91071 |  |  |  |
| 167.1 | 64923.4 |  |  |  |

**Library Spectrum:**

**Difference Spectrum:**

**Comparison Library Link:** https://webbook.nist.gov/cgi/inchi?ID=C16778271&Mask=200

------------------------------------------------------------------------------------------------------------------------------

**Compound Structure:**

**
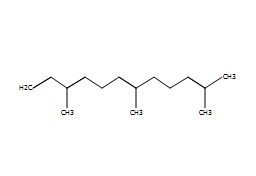
**

| **Compound Label** | **Name** | ***m/z*** | **RT** | **Algorithm** |
| --- | --- | --- | --- | --- |
| Cpd 93: .alpha.-Farnesene $$ 1,3,6,10-Dodecatetraene, 3,7,11-trimethyl- $$ Farnesene | **.alpha.-Farnesene $$ 1,3,6,10-Dodecatetraene, 3,7,11-trimethyl- $$ Farnesene** | 69.1 | 20.67 | Find by Chromatogram Deconvolution |

**MS Spectrum:**

**Zoomed Mass spectrum**

| **MS Spectrum Peak List** | | | | | |
| --- | --- | --- | --- | --- | --- |
| ***m/z*** | **Abund** |  |  |  |  |
| 41.2 | 96289 |  |  |  |  |
| 53.1 | 60279 |  |  |  |  |
| 55.1 | 90397 |  |  |  |  |
| 67.1 | 83051 |  |  |  |  |
| 69.1 | 140760 |  |  |  |  |
| 79.1 | 82702 |  |  |  |  |
| 91.1 | 65643 |  |  |  |  |
| 93.1 | 87672 |  |  |  |  |
| 95.1 | 85189 |  |  |  |  |
| 107.1 | 59687 |  |  |  |  |

**Library Spectrum:**

**Difference Spectrum:**

**Comparison Library Link:** https://webbook.nist.gov/cgi/cbook.cgi?ID=C502614&Mask=200

---------------------------------------------------------------------------------------------------------------------------

**Compound Structure:**

**
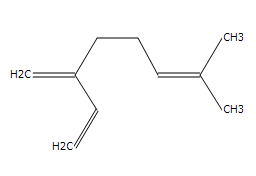
**

| **Compound Label** | **Name** | ***m/z*** | **RT** | **Algorithm** |
| --- | --- | --- | --- | --- |
| Cpd 122: myrcene $$ MYCRENE | **myrcene $$ MYCRENE** | 69.1 | 24.59 | Find by Chromatogram Deconvolution |

**MS Spectrum:**

**Zoomed Mass spectrum**

| **MS Spectrum Peak List** | | | | | |
| --- | --- | --- | --- | --- | --- |
| ***m/z*** | **Abund** |  |  |  |  |
| 41.2 | 75151 |  |  |  |  |
| 69.1 | 83759 |  |  |  |  |
| 71.1 | 39493 |  |  |  |  |
| 81.1 | 67428 |  |  |  |  |
| 93.1 | 66695 |  |  |  |  |
| 105.1 | 34878 |  |  |  |  |
| 120.1 | 11575 |  |  |  |  |
| 133.1 | 23648 |  |  |  |  |
| 136.1 | 13544 |  |  |  |  |
| 147.1 | 12749 |  |  |  |  |

**Library Spectrum:**

**Difference Spectrum:**

**Comparison Library Link:** https://pubchem.ncbi.nlm.nih.gov/compound/Myrcene

-------------------------------------------------------------------------------------------------------------------------------

**Compound Structure:**

**
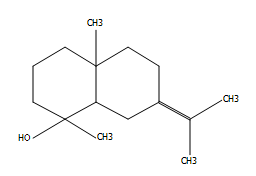
**

| **Compound Label** | **Name** | ***m/z*** | **RT** | **Algorithm** |
| --- | --- | --- | --- | --- |
| Cpd 142: junipercamphor | **junipercamphor** | 43.1 | 28.49 | Find by Chromatogram Deconvolution |

**MS Spectrum:**

**Zoomed Mass spectrum**

| **MS Spectrum Peak List** | | | | |
| --- | --- | --- | --- | --- |
| ***m/z*** | **Abund** |  |  |  |
| 43.1 | 554332.7 |  |  |  |
| 55.1 | 248931.3 |  |  |  |
| 69.1 | 266133.8 |  |  |  |
| 79.1 | 198112.2 |  |  |  |
| 81.1 | 295073.8 |  |  |  |
| 91.1 | 241227.3 |  |  |  |
| 109.1 | 281127.2 |  |  |  |
| 134.1 | 331763.9 |  |  |  |
| 189.1 | 317048.1 |  |  |  |
| 204.2 | 186986.1 |  |  |  |

**Library Spectrum:**

**Difference Spectrum:**

**Comparison Library Link:** https://pubchem.ncbi.nlm.nih.gov/compound/Juniper-camphor

**-----------------------------------------------------------------------------------------------------------------------------**

**Compound Structure:**

| **Compound Label** | **Name** | ***m/z*** | **RT** | **Algorithm** |
| --- | --- | --- | --- | --- |
| Cpd 169: Androstan-17-one, 3-ethyl-3-hydroxy-, (5.alpha.)- | **Androstan-17-one, 3-ethyl-3-hydroxy-, (5.alpha.)-** | 77.1 | 34.34 | Find by Chromatogram Deconvolution |

**MS Spectrum:**

**Zoomed Mass spectrum**

| **MS Spectrum Peak List** | | | | | |
| --- | --- | --- | --- | --- | --- |
| ***m/z*** | **Abund** |  |  |  |  |
| 55.1 | 30204 |  |  |  |  |
| 77.1 | 40699 |  |  |  |  |
| 81.1 | 33215 |  |  |  |  |
| 91.1 | 40610 |  |  |  |  |
| 93.1 | 36379 |  |  |  |  |
| 107.1 | 24830 |  |  |  |  |
| 121.1 | 24431 |  |  |  |  |
| 136.1 | 21679 |  |  |  |  |
| 149.1 | 22380 |  |  |  |  |
| 246.2 | 23126 |  |  |  |  |

**Library Spectrum:**

**Difference Spectrum:**

**Comparison Library Link:** https://webbook.nist.gov/cgi/cbook.cgi?ID=53-42-9&Units=SI

**------------------------------------------------------------------------------------------------------------------------------**

**Table S1:** Detail of compounds identified in GC-MS analysis of Ph.Lo.

| S. No. | Compound Chemical / Label Name | Common Name | RT | Formula | Hits (DB) |
| --- | --- | --- | --- | --- | --- |
| 1 | (1E)-1-(Pentyloxy)-1-butene | Not found | 6.059 | C9H18O | 10 |
| 2 | Cyclohexene, 1-methyl-4-(1-methylethenyl) | Limonene | 6.351 | C10H16 | 10 |
| 3 | 5-Oxopentanoic acid | Keto pentanoate | 6.903 | C5H8O3 | 10 |
| 4 | N-Formyl-2-hydroxy-3-methyl-2-(1-methylethyl) butanamide | Not found | 7.519 | C9H17NO3 | 10 |
| 5 | 4,4-dimethyl-1-heptene | Not found | 7.851 | C9H18 | 10 |
| 6 | 6-Methyl-2,4-heptanedione | Isovaleryl acetone | 8.222 | C8H14O2 | 10 |
| 7 | (5E)-3,6-Dimethyl-5-octen-2-one | Not found | 8.272 | C10H18O | 10 |
| 8 | 6-Methyl-5-octen-2-one | Not found | 8.819 | C9H16O | 10 |
| 9 | 1,3,3-trimethyl-2-norbornanol | Fenchol | 8.973 | C10H18O | 10 |
| 10 | trans-2,7-Dimethyl-4,6-octadien-2-ol | Not found | 9.061 | C10H18O | 10 |
| 11 | 3-Chloro-2-methyl-2-pentanol | Not found | 9.183 | C6H13ClO | 10 |
| 12 | Octanoic acid | Caprylic acid | 9.344 | C8H16O2 | 10 |
| 13 | 6-Methyl-1-heptanol | Isooctanol | 9.917 | C8H18O | 10 |
| 14 | Ethoxymethoxy cyclohexane | Not found | 10.45 | C9H18O2 | 10 |
| 15 | 2-Ethyl-1-butanol, trifluoroacetate | Not found | 10.516 | C8H13F3O2 | 10 |
| 16 | 1-(2,2-Dimethylcyclopentyl)ethanone | Not found | 10.924 | C9H16O | 10 |
| 17 | cis-13-Octadecenal | Not found | 11.116 | C18H34O | 10 |
| 18 | Octane, 1-cyclopropyl | Octylcyclopropane | 11.572 | C11H22 | 10 |
| 19 | (2S,4aS.8aR)-(-)-5,5,8a-Trimethyldecahydronaphthalene-2-yl acetate | Not found | 11.947 | C15H26O2 | 10 |
| 20 | Bornyl acetate / Borneol acetate | Endobornyl Acetate | 11.993 | C12H20O2 | 10 |
| 21 | 6-Methyl-5-octen-2-one | Not found | 12.131 | C9H16O | 10 |
| 22 | Octanal, 7-hydroxy-3,7-dimethyl | Hydroxycitronellal/ Fixol | 12.631 | C10H20O2 | 10 |
| 23 | 5,9-Tetradecadiyne | Not found | 12.999 | C14H22 | 10 |
| 24 | 2-Isopropenyl-5-methyl-6-hepten-1-ol | Not found | 13.455 | C11H20O | 10 |
| 25 | Limonene Dioxide -2 | Limonene Dioxide-2 | 13.767 | C10H16O2 | 10 |
| 26 | 2-Pentanone, 3-[(acetyloxy)methyl]-3,4-dimethyl-, (.+-.)- | Not found | 13.953 | C10H18O3 | 10 |
| 27 | Bicyclo[2.2.1]heptane-2-carboxaldehyde, 3-methyl-, (2-endo,3-exo)- | Limonene Dioxide-1 | 14.091 | C9H14O | 10 |
| 28 | Limonene Dioxide 1 | Not found | 14.201 | C10H16O2 | 10 |
| 29 | CIS-1,3-Diisopropenyl-Trans-4-Vinyl-4-Methylcyclohexane | beta.-Elemene | 14.359 | C15H24 | 10 |
| 30 | 2-Butanone, 4-(2,2-dimethyl-6-methylenecyclohexyl) | Not found | 14.446 | C13H22O | 10 |
| 31 | 4-Methylhept-6-En-3-One | Not found | 14.535 | C8H14O | 10 |
| 32 | Gamma Caryophyllene | isocaryophyllene | 14.708 | C15H24 | 10 |
| 33 | 2-Butanone, 4-(2,6,6-trimethyl-2-cyclohexen-1-yl) | Dihydro .alpha. ionone | 14.822 | C13H22O | 10 |
| 34 | Igamma Caryophyllene | isocaryophyllene | 14.988 | C15H24 | 10 |
| 35 | p-Menth-8-en-1-ol, stereoisomer | cis-.beta.-Terpineol | 15.092 | C10H18O | 10 |
| 36 | 7,8-Dihydro beta ionone | Dihydro beta ionone | 15.277 | C13H22O | 10 |
| 37 | 5,9-Undecadien-2-one, 6,10-dimethyl | cis-Geranylacetone | 15.504 | C13H22O | 10 |
| 38 | 4-Isopropenyl-1-methyl-7-oxabicyclo[4.1.0]heptan-2-one | cis-Carvone oxide | 15.648 | C10H14O2 | 10 |
| 39 | 1,3,6-Octatriene, 3,7-Dimethyl-, (E)- | Beta-Ocimene | 15.697 | C10H16 | 10 |
| 40 | (E)-3,4-Epoxy-1-(1',2'-epoxy-3',3'-epoxymethano-2',6',6'-trimethyl-1'-cycloh... | Not found | 15.751 | C15H22O3 | 10 |
| 41 | Cyclopentane, 2-ethylidene-1,1-dimethyl | Not found | 15.843 | C9H16 | 10 |
| 42 | Trans-Sabinene Hydrate | 4-Thujanol | 15.901 | C10H18O | 10 |
| 43 | (-)-Globulol | Globulol | 16.105 | C15H26O | 10 |
| 44 | 2-Heptene, 2-methyl-6-p-tolyl | Not found | 16.185 | C15H22 | 10 |
| 45 | 1,6,10-Dodecatrien-3-ol, 3,7,11-trimethyl | Nerolidol/ E-farnesol | 16.27 | C15H26O | 10 |
| 46 | Guaia-1(10),11-diene | Alpha Bulnesene | 16.382 | C15H24 | 10 |
| 47 | 2(3H)-Benzofuranone, hexahydro-4,4,7a-trimethyl | Tetrahydroactinidiolide | 16.542 | C11H18O2 | 10 |
| 48 | 1.Xi.,6.xi.,7.xi.-Cadina-4,9-diene | Alpha Muurolene | 16.591 | C15H24 | 10 |
| 49 | Alpha-Bisabolene | Bisabolene | 16.707 | C15H24 | 10 |
| 50 | 4-Isopropenyl-1-methyl-7-oxabicyclo[4.1.0]heptane | cis Limonene oxide | 16.768 | C10H16O | 10 |
| 51 | (+)-Sativen | Sativene | 16.84 | C15H24 | 10 |
| 52 | 4-Isopropenyl-1-methylcyclohexanol | Terpineol | 16.958 | C10H18O | 10 |
| 54 | Farnesyl Acetone C | Not found | 17.017 | C18H30O | 3 |
| 55 | 2(1H)-Naphthalenone, octahydro-4a,7,7-trimethyl-, ciss | Not found | 17.205 | C13H22O | 10 |
| 56 | Allyl(chloromethyl) dimethylsilane | Not found | 17.363 | C6H13ClSi | 4 |
| 57 | 3-Allyl-2,6,6-trimethylbicyclo[3.1.1]heptane | Not found | 17.413 | C13H22 | 10 |
| 58 | 1,13-Tetradecadiene | Not found | 17.594 | C14H26 | 10 |
| 59 | Bicyclo[4.1.0]heptane,-3-cyclopropyl,-7-hydroxymethyl, trans | Not found | 17.72 | C11H18O | 10 |
| 60 | cis-5-Methyl-2,3,3a,4,7,7a-hexahydroinden-1-one | Not found | 17.757 | C10H14O | 8 |
| 61 | 1,6,10-Dodecatrien-3-ol, 3,7,11-trimethyl-, [S-(Z)]-(+)-Nerolidol | Not found | 17.838 | C15H26O | 10 |
| 62 | 2H-cyclopropa[g]benzofuran, 4,5,5a,6,6a,6b-hexahydro-4,4,6b-Trimethyl | Benzofuran | 17.926 | C15H22O | 7 |
| 63 | Cyclopropanemethanol, 2-methyl-2-(4-methyl-3-pentenyl) | Not found | 18.07 | C11H20O | 10 |
| 64 | Cyclohexanol, 2-Methylene-5-(1-Methylethenyl)-, (1s-Trans) | Not found | 18.205 | C10H16O | 10 |
| 65 | Bicyclo[2.2.2]oct-2-ene, 1,2,3,6-tetramethyl | Not found | 18.448 | C12H20 | 10 |
| 66 | (1R,5S,8R,9R)-4,4,8-trimethyltricyclo[6.3.1.0(1,5)]dodeca-2-en-9-old | Not found | 18.481 | C15H24O | 10 |
| 67 | Limonene Dioxide 2 | Limonene Dioxide 2 | 18.539 | C10H16O2 | 10 |
| 68 | 3-(1-Methylhept-1-enyl)-5-methyl-2,5-dihydrofuran-2-one | Not found | 18.594 | C13H20O2 | 10 |
| 69 | (-)-.beta.-Caryophyllene epoxide | Caryophyllene oxide | 18.662 | C15H24O | 10 |
| 70 | 1,1,4,7-Tetramethyldecahydro-1H-cyclopropa[e]azulen-4-ol | Epiglobulol | 18.747 | C15H26O | 10 |
| 71 | 1-Dodecyn-3-ol | Not found | 18.931 | C12H22O | 1 |
| 72 | Naphthalene, decahydro | Decahydronaphthalene | 18.951 | C10H18 | 10 |
| 73 | 7,8-Epoxy-.alpha.-ionone | Not found | 19.056 | C13H20O2 | 10 |
| 74 | 3-Heptadecen-5-yne, (Z)- | Not found | 19.162 | C17H30 | 10 |
| 75 | Geranyl acetate [trans-3,7-dimethyl-2,6-octadien-1-ylacetate] | Not found | 19.271 | C12H20O2 | 3 |
| 76 | cis-3-Hexenyl phenyl acetate | Benzeneacetic acid | 19.316 | C14H18O2 | 10 |
| 77 | (-)-Caryophyllene oxide | Caryophyllene epoxide | 19.393 | C15H24O | 10 |
| 78 | 7,8,8a,9-Tetrahydro-8a-methylnaphtho[2,3-b]furan-4,5(4aH,6H)-dione | Not found | 19.427 | C13H14O3 | 10 |
| 79 | Veridiflorol | Veridiflorol | 19.519 | C15H26O | 10 |
| 80 | cyclohexane, 1,5-diethenyl-2,3-dimethyl-, (1.alpha.,2.beta.,3.beta.,5.beta.)- | Not found | 19.784 | C12H20 | 10 |
| 81 | 1-(3,3-dimethyl-bicyclo[2.2.1.]hept-2-yl)-2-penten-1-one | Not found | 19.973 | C14H22O | 1 |
| 82 | 2,6,10,14-Tetramethyl-2R,3R-epoxy-6E,10E,14E-hexadecatrien-1,16-diol | Not found | 20.095 | C20H34O3 | 10 |
| 83 | 8(12)-Drimen-7.alpha.,11-diol | Not found | 20.126 | C15H26O2 | 10 |
| 84 | 6-exo-Methoxy-3-methyl-3a,6a-dihydrofuro[3,4-d]isoxazol-4(6H)-one | Not found | 20.215 | C7H9NO4 | 1 |
| 85 | 11-Hexadecyn-1-ol | Not found | 20.338 | C16H30O | 10 |
| 86 | 2,6-Dimethyl-4-oxo-11-oxatricyclo[5.4.2.1(7,10).0(5,10)]undec-8-ene | Not found | 20.381 | C12H16O2 | 5 |
| 87 | 1,3,6,10-Dodecatetraene, 3,7,11-trimethyl- | Farnesene | 20.669 | C15H24 | 10 |
| 88 | Bergamotol, Z-.alpha.-trans- | Bergamotol | 20.826 | C15H24O | 10 |
| 89 | Pyrimidine, 4-cyclopropyl- | Cyclopropyl pyrimidine | 20.909 | C7H8N2 | 6 |
| 90: | 7-Oxabicyclo[4.1.0]heptane, 1-methyl-4-(2-methyloxiranyl)- | Dipentene dioxide | 21.338 | C10H16O2 | 10 |
| 91: | 5-Methylenedec-9-en-2-one | Not found | 21.645 | C11H18O | 10 |
| 92: | Bi-1-cycloocten-1-yl | Not found | 21.883 | C16H26 | 10 |
| 93: | Limonene Dioxide 2 | Limonene Dioxide 2 | 21.966 | C10H16O2 | 10 |
| 94: | Limonene Dioxide 4 | Limonene Dioxide 4 | 22.123 | C10H16O2 | 10 |
| 95: | Benzene, 4-fluoro-1,2-dimethyl- | 4-fluoro-1,2-xylene | 22.383 | C8H9F | 10 |
| 96: | 1-Pentyn-3-one, 4-methyl- | 2-Methyl-3-Oxo-4-Pentyne | 22.419 | C6H8O | 1 |
| 97 | Methyl 10,12-heptadecadiynoate | Not found | 22.507 | C18H28O2 | 10 |
| 98 | 2,6,10,14,18,22-Tetracosahexaene, 2,6,10,15,19,23-hexamethyl-, (all-E)- | Not found | 22.567 | C30H50 | 2 |
| 99 | 5-Hexyl-3,3-dimethyl-1-cyclopentene | Not found | 22.754 | C13H24 | 10 |
| 100 | (7E)-4,8,12-Trimethyltrideca-2,3,7,11,-tetraene-1-ol | NF | 22.917 | C16H26O | 3 |
| 101 | (-)-Campherenone | Campherenone | 23.016 | C15H24O | 5 |
| 102 | 5,8-methano-3,4,4a,5,6,7,8,8a-octahydro-1H-2-benzopyran-1-one | Not found | 23.104 | C10H14O2 | 1 |
| 103 | 1-(hydroxymethyl)-2-vinylcyclopentane | Not found | 23.21 | C8H14O | 10 |
| 104 | 3,4-Dimethylhexanedial | Not found | 23.431 | C8H10O2 | 10 |
| 105 | 4-Isopropenyl-4,7-dimethyl-1-oxaspiro[2.5]octane | Not found | 24.037 | C12H20O | 10 |
| 106 | 6-Methyl-2-heptanone | Not found | 24.358 | C8H16O | 10 |
| 107 | Bicyclo[4.3.0]nonane, 7-methylene-2,4,4-trimethyl-2-vinyl- | Not found | 24.449 | C15H24 | 10 |
| 108 | myrcene | Mycrene | 24.592 | C10H16 | 1 |
| 109 | 5-Isopropyl-3-phenyl-2-thiohydantoin | Not found | 24.776 | C12H14N2OS | 1 |
| 110 | 4-[Acetylmethyl]-3,3-dimethyl-3,4-dihydrobenzopyran-2H-2-one | Not found | 24.91 | C14H16O3 | 1 |
| 111 | 15-Chloro-4-pentadecyne | Not found | 25.483 | C15H27Cl | 10 |
| 112 | longipinanol | longipinanol | 25.663 | C15H26O | 3 |
| 113 | 1-Methyl-6-(3-methylbuta-1,3-dienyl)-7-oxabicyclo[4.1.0]heptane | Not found | 25.831 | C12H18O | 10 |
| 114 | 3-Buten-2-ol, 3-methyl-4-(2,6,6-trimethyl-2-cyclohexen-1-yl)- | Not found | 26.258 | C14H24O | 10 |
| 115 | 7,7-dichlorobicyclo[3.2.0]hept-2-en-6-one | Not found | 26.634 | C15H24O | 10 |
| 116 | 2-Isopropyl-tricyclo[4.3.1.1(2,5)]undec-3-en-10-ol | Not found | 26.819 | C14H22O | 10 |
| 117 | But-3-enal, 2-methyl-4-(2,6,6-trimethyl-1-cyclohexenyl)- | Not found | 27.177 | C14H22O | 10 |
| 118 | 6,6,10-Trimethylundeca-3,8,10-triene-2,7-dione | Not found | 27.3 | C14H20O2 | 3 |
| 119 | 5-Iminopyrrolidine-2-carbonitrile | Not found | 27.746 | C5H7N3 | 7 |
| 120 | 7,7-dichlorobicyclo[3.2.0]hept-2-en-6-one | Not found | 27.908 | C15H24O | 10 |
| 121 | 1,3,5-Cycloheptatriene, 3,4-diethyl-7,7-dimethyl- | Not found | 28.274 | C13H20 | 10 |
| 122 | juniper camphor | Juniper camphor | 28.487 | C15H26O | 10 |
| 123 | Longifolenaldehyde | longifolenaldehyde | 28.782 | C15H24O | 10 |
| 124 | (E)-3-(3'-methyl-1',3'-butadienyl)-2,4,4-trimethylcyclohexanone | Not found | 29.125 | C14H22O | 10 |
| 125 | N-2-Methylpropanoyl-3,4-dihydro-1H-2,1-benzoxazine | Not found | 29.524 | C12H15NO2 | 2 |
| 126 | Benzo[e]isobenzofuran-1,4-dione,1,3,4,5,5a,6,7,8,9,9a- decahydro-6,6,9a-trime | Not found | 29.9 | C15H20O3 | 10 |
| 127 | (+-)cis-1,2-Dihydroxy-1,2,3,4-tetrahydrochrysene | Not found | 29.922 | C18H16O2 | 5 |
| 128 | 3h-Cyclodeca[B]Furan-2-One, 4,9-Dihydroxy-6-Methyl-3,10-Dimethylene-3a | Not found | 30.391 | C15H20O4 | 10 |
| 129 | Cyclopentanecarboxaldehyde, 2-methyl-3-methylene- | Not found | 30.596 | C8H12O | 10 |
| 130 | Cycloisolongifolene | Cycloisolongifolene | 31.629 | C15H24 | 10 |
| 131 | aromadendrene 2 | aromadendrene | 31.933 | C15H24 | 10 |
| 132: | Cyclopentanone, 2-(2-octenyl)- | Not found | 32.24 | C13H22O | 10 |
| 133 | iso-velleral | Isovelleral | 32.564 | C15H20O2 | 10 |
| 134 | iso-velleral | Isovelleral | 32.907 | C15H20O2 | 10 |
| 135 | allyl ionone 1 | Allyl Ionone | 33.71 | C16H24O | 10 |
| 136 | Cyclohexane, (1-Bromo-3,3-dimethyl-2-hydroxybutylidene)- | Not found | 34.152 | C12H21BrO | 6 |
| 137 | Androstan-17-one, 3-ethyl-3-hydroxy-, (5.alpha.)- | Androstan | 34.34 | C21H34O2 | 10 |
| 138 | Ethyl 5,8,11,14,17-eicosapentaenoate | Not found | 35.817 | C22H34O2 | 10 |
| 139 | 2-(4a,8-Dimethyl-1,2,3,4,4a,5,6,7-octahydro-naphthalen-2-yl)-prop-2-en-1-ol | Not found | 36.021 | C15H24O | 10 |
| 140 | 1,2-Benzenedicarboxylic acid, bis(2-ethylhexyl) ester | DEHP/ DNOP | 39.649 | C24H38O4 | 10 |
| 141 | Cholest-5-ene, 3-bromo-, (3.beta.) | Not found | 48.262 | C27H45Br | 10 |
